# Supplementary material for: Meteorological Influences on Spatiotemporal Variation of PM2.5 Concentrations in Atmospheric Pollution Transmission Channel Cities of the Beijing–Tianjin–Hebei Region, China
Source: MDPI journal article supplement (doi:10.3390/ijerph19031607), 2022-01-30
Supplement: s1 [file s1]

Table S1 Summary of major air pollution control measures taken in 《The work plan for air pollution prevention and control in Beijing, Tianjin, Hebei and surrounding areas in 2017》

| Number | Main tasks                                            | Main measures                                                                      | Major Specific indicators                                                                                                                | Scope                                                                                              |
|--------|-------------------------------------------------------|------------------------------------------------------------------------------------|------------------------------------------------------------------------------------------------------------------------------------------|----------------------------------------------------------------------------------------------------|
| 1      | Industrial structure adjustment                       | Increase the capacity to resolve overcapacity                                      | Resolve steel overcapacity                                                                                                               | 28 cities in atmospheric pollution transmission channel of the Beijing–Tianjin–Hebei region, China |
|        |                                                       | ban on illegal "small scattered pollution" enterprises                             | Below pollutant discharge standard<br>Incomplete procedures                                                                              |                                                                                                    |
| 2      | Comprehensively promote clean heating in winter       | Implement key projects of clean heating in winter                                  | 50–100 thousand households replacing coal with gas or electricity per city<br>Construction of "no coal zone"                             |                                                                                                    |
|        |                                                       | Complete the "clearing" of small coal-fired boilers                                | Eliminate coal-fired boilers of 10 steam tons and below                                                                                  |                                                                                                    |
|        |                                                       | Achieve negative growth in total coal consumption                                  | Achieved full coverage of central heating or clean energy heating for county with a population of more than 200 thousand                 |                                                                                                    |
| 3      | Comprehensive control of industrial air pollution     | Implementation of special emission limits                                          | Special emission limits for steel and coal-fired boilers                                                                                 |                                                                                                    |
|        |                                                       | Comprehensively promote the management of pollutant discharge permits              | Pollutant discharge permits for steel, power plant and cement industries                                                                 |                                                                                                    |
|        |                                                       | Comprehensive control of volatile organic compounds (VOCs)                         |                                                                                                                                          |                                                                                                    |
| 4      | Implement staggered peak production in heating season | Fully implement staggered peak production for cement, casting and other industries | Staggered peak production for cement, casting and other industries<br>Shut down coal fired generator without ultra-low emission          |                                                                                                    |
|        |                                                       | Production restrictions for iron and steel enterprises in key cities               | Steel production capacity limiting 50% in heating season in key cities                                                                   |                                                                                                    |
|        |                                                       | Production regulation of electrolytic aluminum and chemical enterprises            | Electrolytic aluminum, alumina production capacity limiting 30%,<br>Carbon enterprise production capacity limiting 50% in heating season |                                                                                                    |
| 5      | Strictly control motor vehicle emissions              | Ban on accepting coal transportation by road in Tianjin Port                       |                                                                                                                                          |                                                                                                    |
|        |                                                       | Comprehensively strengthen the monitoring capacity of motor vehicle emission       | Screening diesel trucks and high emission gasoline vehicles                                                                              |                                                                                                    |
|        |                                                       | Strengthen diesel vehicle management and control                                   | Heavy diesel vehicles control in Sixth Ring Road in Beijing                                                                              |                                                                                                    |
|        |                                                       | Strengthen the supervision and management of oil quality and vehicle urea          | Supplying with gasoline and diesel meeting the national six standards<br>No selling ordinary diesel                                      |                                                                                                    |
| 6      | Improve the level of urban management                 | Strictly control dust emission                                                     | Dustfall less than 9 tons/month/square kilometers in Beijing, Langfang and Baoding                                                       |                                                                                                    |
|        |                                                       | Fully implement the requirements of no burning and no emission                     | No open burning<br>Restriction of fireworks and firecrackers                                                                             |                                                                                                    |

Table S2. Partial correlations of PM<sub>2.5</sub> concentration with meteorological variables at the seasonal scale based on daily data during 2014–2019.

| Scale  | Var              | Correlation coefficient |       |       |       |       |       |       |       |       |       |       |       |       |       |       |       |       |       |       |       |       |       |       |       |       |       |       |       |
|--------|------------------|-------------------------|-------|-------|-------|-------|-------|-------|-------|-------|-------|-------|-------|-------|-------|-------|-------|-------|-------|-------|-------|-------|-------|-------|-------|-------|-------|-------|-------|
|        |                  | BJ                      | TJ    | TS    | LF    | BD    | SJZ   | CZ    | HS    | XT    | HD    | BZ    | DZ    | ZB    | JN    | LC    | JNI   | HZ    | AY    | HB    | PY    | XX    | JZ    | ZZ    | KF    | TY    | YQ    | CZ    | JC    |
| Spring | SH               | -0.06                   | -0.21 | -0.12 | -0.11 | -0.20 | -0.18 | 0.00  | -0.17 | -0.23 | -0.06 | -0.28 | -0.05 | -0.29 | -0.08 | -0.05 | -0.16 | -0.03 | -0.17 | -0.13 | -0.04 | -0.06 | 0.01  | -0.02 | 0.01  | -0.29 | -0.17 | -0.17 | 0.04  |
|        | T <sub>max</sub> | -0.01                   | 0.27  | 0.20  | 0.12  | 0.14  | 0.19  | 0.09  | 0.20  | 0.29  | 0.13  | 0.32  | 0.10  | 0.29  | 0.02  | 0.06  | 0.12  | 0.01  | 0.16  | 0.08  | 0.08  | 0.03  | 0.01  | 0.02  | 0.02  | 0.27  | 0.18  | 0.19  | 0.09  |
|        | T <sub>min</sub> | -0.19                   | -0.32 | -0.25 | -0.25 | -0.32 | -0.35 | -0.12 | -0.33 | -0.30 | -0.26 | -0.31 | -0.17 | -0.31 | 0.00  | -0.17 | -0.12 | -0.08 | -0.29 | -0.20 | -0.23 | -0.15 | -0.16 | -0.14 | -0.08 | -0.36 | -0.28 | -0.25 | -0.27 |
|        | AP               | -0.18                   | -0.06 | -0.05 | -0.09 | -0.09 | -0.18 | 0.00  | -0.05 | 0.15  | -0.03 | 0.02  | -0.03 | 0.02  | 0.04  | 0.02  | 0.02  | 0.00  | -0.06 | -0.03 | -0.02 | -0.04 | -0.06 | -0.03 | 0.01  | -0.15 | -0.09 | -0.04 | -0.07 |
|        | H                | 0.32                    | 0.25  | 0.32  | 0.33  | 0.28  | 0.21  | 0.32  | 0.30  | 0.23  | 0.38  | 0.06  | 0.24  | 0.14  | 0.13  | 0.28  | 0.14  | 0.17  | 0.15  | 0.26  | 0.33  | 0.25  | 0.32  | 0.22  | 0.20  | 0.21  | 0.23  | 0.14  | 0.22  |
|        | WS               | -0.15                   | -0.30 | -0.13 | -0.05 | -0.13 | -0.36 | -0.11 | -0.14 | -0.25 | -0.05 | -0.28 | -0.09 | -0.13 | -0.24 | -0.20 | -0.06 | -0.34 | -0.09 | -0.04 | -0.19 | -0.12 | -0.10 | -0.21 | -0.19 | -0.14 | 0.08  | -0.17 | -0.14 |
|        | WD               | 0.02                    | -0.02 | -0.06 | 0.08  | -0.10 | -0.12 | 0.08  | 0.09  | -0.02 | 0.06  | 0.14  | 0.07  | -0.01 | 0.04  | -0.06 | 0.04  | -0.04 | 0.04  | -0.02 | -0.09 | -0.01 | -0.06 | -0.01 | 0.05  | 0.05  | -0.25 | -0.08 | -0.04 |
| Summer | SH               | -0.27                   | -0.32 | -0.10 | -0.09 | -0.28 | -0.44 | -0.08 | -0.20 | -0.33 | -0.10 | -0.35 | -0.20 | -0.38 | -0.21 | -0.17 | -0.21 | -0.24 | -0.22 | -0.33 | -0.16 | -0.15 | -0.03 | -0.19 | -0.19 | -0.26 | -0.15 | -0.02 | -0.10 |
|        | T <sub>max</sub> | 0.12                    | 0.26  | 0.05  | 0.07  | 0.18  | 0.26  | 0.04  | 0.17  | 0.27  | 0.10  | 0.22  | 0.12  | 0.35  | 0.15  | 0.29  | 0.13  | 0.22  | 0.18  | 0.20  | 0.14  | 0.09  | -0.05 | 0.15  | 0.18  | 0.27  | 0.13  | 0.21  | 0.20  |
|        | T <sub>min</sub> | 0.11                    | -0.10 | 0.07  | 0.09  | 0.02  | -0.19 | 0.13  | -0.03 | -0.12 | -0.10 | -0.09 | 0.03  | -0.34 | -0.17 | -0.27 | -0.18 | -0.22 | -0.12 | -0.16 | -0.14 | -0.15 | -0.08 | -0.18 | -0.15 | -0.02 | 0.10  | -0.17 | -0.15 |
|        | AP               | 0.04                    | 0.01  | -0.03 | 0.01  | -0.01 | -0.19 | 0.05  | 0.10  | 0.09  | -0.02 | 0.00  | 0.10  | 0.02  | 0.07  | 0.11  | 0.06  | 0.05  | 0.05  | -0.03 | 0.06  | 0.00  | -0.13 | 0.03  | 0.07  | -0.03 | 0.03  | 0.06  | 0.01  |
|        | H                | 0.09                    | -0.03 | -0.05 | 0.05  | -0.02 | -0.04 | -0.07 | 0.11  | 0.04  | 0.09  | -0.20 | -0.09 | 0.04  | -0.06 | 0.22  | -0.12 | -0.07 | -0.04 | 0.02  | -0.03 | -0.02 | -0.01 | -0.07 | -0.09 | 0.05  | 0.07  | 0.18  | 0.09  |
|        | WS               | 0.11                    | -0.11 | 0.01  | -0.04 | -0.18 | -0.33 | -0.03 | -0.10 | -0.14 | -0.13 | -0.24 | -0.10 | -0.10 | -0.15 | -0.21 | 0.02  | -0.35 | -0.10 | -0.10 | -0.18 | -0.14 | -0.08 | -0.11 | -0.12 | -0.01 | 0.08  | -0.11 | -0.16 |
|        | WD               | 0.30                    | 0.05  | 0.07  | 0.11  | 0.12  | -0.06 | 0.04  | 0.14  | 0.07  | -0.01 | 0.11  | 0.01  | 0.00  | 0.11  | 0.02  | 0.02  | -0.08 | 0.08  | -0.01 | 0.02  | 0.01  | -0.10 | -0.01 | 0.03  | 0.13  | -0.19 | -0.01 | -0.06 |
| Autumn | SH               | -0.08                   | -0.18 | -0.22 | -0.17 | -0.33 | -0.29 | -0.11 | -0.21 | -0.28 | -0.17 | -0.25 | -0.29 | -0.26 | -0.07 | -0.05 | -0.17 | -0.11 | -0.22 | -0.16 | 0.02  | -0.14 | -0.04 | -0.11 | -0.07 | -0.20 | -0.22 | -0.07 | -0.06 |
|        | T <sub>max</sub> | -0.10                   | 0.10  | 0.09  | 0.06  | 0.09  | 0.16  | -0.03 | 0.16  | 0.27  | 0.10  | 0.27  | 0.18  | 0.26  | -0.03 | 0.10  | 0.23  | 0.11  | 0.14  | 0.03  | -0.06 | 0.09  | 0.04  | 0.02  | 0.08  | 0.19  | 0.18  | 0.05  | 0.18  |
|        | T <sub>min</sub> | -0.10                   | -0.26 | -0.24 | -0.21 | -0.32 | -0.36 | -0.13 | -0.32 | -0.35 | -0.25 | -0.32 | -0.29 | -0.37 | -0.03 | -0.25 | -0.33 | -0.22 | -0.30 | -0.25 | -0.21 | -0.22 | -0.19 | -0.21 | -0.21 | -0.42 | -0.34 | -0.17 | -0.36 |
|        | AP               | -0.31                   | -0.26 | -0.19 | -0.21 | -0.28 | -0.33 | -0.17 | -0.19 | -0.10 | -0.18 | -0.10 | -0.17 | -0.10 | -0.07 | -0.08 | -0.11 | -0.06 | -0.21 | -0.15 | -0.13 | -0.12 | -0.15 | -0.15 | -0.11 | -0.30 | -0.24 | -0.17 | -0.14 |
|        | H                | 0.27                    | 0.32  | 0.33  | 0.19  | 0.12  | 0.11  | 0.17  | 0.27  | 0.17  | 0.22  | 0.15  | 0.13  | 0.22  | 0.11  | 0.32  | 0.16  | 0.14  | 0.05  | 0.16  | 0.15  | 0.20  | 0.17  | 0.04  | 0.06  | 0.29  | 0.15  | -0.02 | 0.13  |
|        | WS               | -0.17                   | -0.33 | -0.16 | -0.13 | -0.17 | -0.23 | -0.11 | -0.15 | -0.28 | -0.12 | -0.17 | -0.14 | -0.06 | -0.19 | -0.13 | -0.04 | -0.24 | -0.17 | -0.04 | -0.21 | -0.14 | -0.13 | -0.22 | -0.25 | -0.09 | 0.04  | -0.25 | -0.17 |
|        | WD               | 0.02                    | 0.09  | 0.02  | 0.11  | 0.00  | -0.08 | 0.09  | 0.05  | -0.05 | -0.02 | 0.10  | 0.06  | 0.04  | 0.02  | -0.02 | 0.01  | -0.08 | -0.03 | 0.05  | 0.06  | -0.04 | -0.02 | -0.03 | -0.07 | 0.09  | -0.11 | -0.13 | -0.09 |
| Winter | SH               | -0.16                   | -0.22 | -0.34 | -0.26 | -0.38 | -0.39 | -0.26 | -0.31 | -0.32 | -0.30 | -0.36 | -0.27 | -0.39 | -0.31 | -0.17 | -0.13 | -0.25 | -0.28 | -0.21 | -0.17 | -0.26 | -0.19 | -0.18 | -0.21 | -0.26 | -0.38 | -0.17 | -0.16 |
|        | T <sub>max</sub> | 0.01                    | 0.25  | 0.26  | 0.24  | 0.27  | 0.31  | 0.28  | 0.29  | 0.25  | 0.31  | 0.39  | 0.30  | 0.29  | 0.25  | 0.20  | 0.24  | 0.29  | 0.22  | 0.10  | 0.15  | 0.15  | 0.14  | 0.12  | 0.24  | 0.24  | 0.30  | 0.13  | 0.29  |
|        | T <sub>min</sub> | -0.08                   | -0.23 | -0.24 | -0.27 | -0.31 | -0.34 | -0.21 | -0.25 | -0.20 | -0.28 | -0.27 | -0.19 | -0.20 | -0.09 | -0.17 | -0.25 | -0.20 | -0.07 | 0.02  | -0.10 | -0.11 | -0.15 | -0.07 | -0.19 | -0.19 | -0.14 | 0.01  | -0.22 |
|        | AP               | -0.22                   | -0.16 | -0.14 | -0.14 | -0.14 | -0.18 | -0.16 | -0.07 | -0.17 | -0.10 | -0.13 | -0.07 | -0.12 | -0.02 | -0.10 | -0.07 | -0.04 | -0.04 | -0.05 | -0.03 | -0.06 | -0.10 | -0.07 | -0.03 | -0.05 | -0.02 | 0.01  | 0.06  |
|        | H                | 0.46                    | 0.37  | 0.40  | 0.44  | 0.27  | 0.35  | 0.35  | 0.30  | 0.28  | 0.40  | 0.23  | 0.32  | 0.37  | 0.30  | 0.36  | 0.38  | 0.35  | 0.28  | 0.37  | 0.33  | 0.25  | 0.31  | 0.26  | 0.29  | 0.45  | 0.39  | 0.20  | 0.34  |
|        | WS               | -0.04                   | -0.26 | -0.07 | -0.07 | -0.14 | -0.23 | -0.16 | -0.12 | -0.18 | -0.20 | -0.24 | -0.22 | -0.24 | -0.31 | -0.24 | -0.12 | -0.31 | -0.22 | -0.18 | -0.27 | -0.18 | -0.16 | -0.21 | -0.24 | -0.09 | -0.08 | -0.29 | -0.08 |
|        | WD               | -0.02                   | 0.09  | 0.04  | 0.04  | 0.05  | -0.02 | 0.19  | 0.01  | 0.09  | -0.21 | 0.13  | 0.28  | 0.13  | 0.13  | -0.11 | 0.13  | -0.17 | 0.02  | -0.03 | -0.08 | -0.05 | 0.03  | 0.00  | -0.09 | -0.05 | -0.08 | -0.13 | -0.13 |

Note: Red font denotes  $P < 0.05$ .

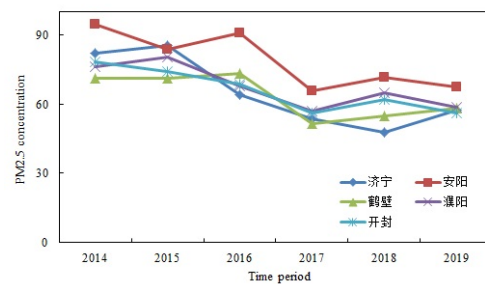

Figure S1 The cities with PM<sub>2.5</sub> concentration fluctuating upward after 2017.
